# Supplementary material for: Aplysin Retards Pancreatic Necrosis and Inflammatory Responses in NOD Mice by Stabilizing Intestinal Barriers and Regulating Gut Microbial Composition
Source: Hindawi journal article supplement (doi:10.1155/2020/1280130), 2020-08-01
Supplement: f1 [file 1280130.f1.pdf]

### Supplementary data 1:

**Components of aplysin structure analyzed by infrared radiation (IR), electron impact-mass spectrometry (EI-MS), <sup>1</sup>H-nuclear magnetic resonance (NMR) and <sup>13</sup>C-NMR.**

**IR  $\nu_{\text{max}}^{\text{KBr}}$   $\text{cm}^{-1}$ :** 2 952, 2 864, 1 577, 1 487, 1 460, 1 375, 1 308, 1 267, 1 234, 1 192, 1 007, 904, 881, 862.

**EI-MS  $m/z$  (%)**: 296 [ $\text{M} (^{81}\text{Br})^+$ ] (100), 294 [ $\text{M} (^{79}\text{Br})^+$ ] (100), 281 [ $\text{M} (^{81}\text{Br}) - \text{CH}_3$ ]<sup>+</sup> (95), 279 [ $\text{M} (^{79}\text{Br}) - \text{CH}_3$ ]<sup>+</sup> (95), 239 (45), 237 (45), 200 [ $\text{M}-\text{Br}$ ]<sup>+</sup> (35), 160 (16), 115 (12), 109 (10), 69 (5).

**<sup>1</sup>H-NMR ( $\text{CD}_3\text{COCD}_3$ , 500 MHz)W**: 1.06 (3H, d,  $J$ = 6.5 Hz, H-9), 1.04~1.08 (1H, m, H-2a), 1.27 (3H, s, H-10), 1.33 (3H, s, H-12), 1.60~1.68 (2H, m, H-2b, 1a), 1.81~1.86 (2H, m, H-1b, 3), 2.26 (3H, s, H-11), 6.60 (1H, s, H-5), 7.2 (1H, s, H-8).

**<sup>13</sup>C-NMR ( $\text{CD}_3\text{COCD}_3$ , 125 MHz)W**: 43.0 (C-1), 31.9 (C-2), 46.6 (C-3), 100.4 (C-3a), 159.4 (C-4a), 110.5 (C-5), 137.5 (C-6), 114.3 (C-7), 127.3 (C-8), 137.4 (C-8a), 55.1 (C-8b), 13.3 (C-9), 23.1 (C-10), 23.4 (C-11), 20.1 (C-12).

By comparing with corresponding literature data [1,2], this compound was identified as aplysin.

### References

- [1] J. Y. Laronze, R. E. I. Boukili, D. Patigny, S. Dridi, D. Cartier and J. Lévy, "The rearrangement of some cyclopentanone-aryloximes: synthesis of (±)-aplysin, (±)-filiformin and of their debromo analogues," *Tetrahedron*, vol. 47, no. 48, pp. 10003-10014, 1991.
- [2] D. C. Harrowven, M. C. Lucas and P. D. Howes, "The synthesis of a natural product family: from debromoisolaurinterol to the aplysin," *Tetrahedron*, vol. 57, no. 2001, pp. 791-804, 2001.
